# Supplementary material for: Stereoselective (4 + 3) cycloadditions of allenyl ethers-furans by chiral auxiliaries inducing and evaluation of anti-breast cancer activity
Source: Front Plant Sci. 2022 Dec 21;13:1087899. doi: 10.3389/fpls.2022.1087899 (PMC9812524; doi:10.3389/fpls.2022.1087899)
Supplement: Supplementary file 1 [file DataSheet_1.docx]

Stereoselective (4 + 3) Cycloadditions of Allenyl Ethers-Furans by Chiral Auxiliaries inducing and Evaluation of Anti-Breast Cancer Activity

Wenli Lei1, Yuyang Song1, Ai Long1, Yanyan Que1, Shuzhong He1, 2*, Hang Zhong1*, Yang Chen3*

1. School of Pharmaceutical Sciences, and Guizhou Engineering Laboratory for Synthetic Drugs, Guizhou University, Guiyang, Guizhou 550025, China.

2. State Key Laboratory of Functions and Applications of Medicinal Plants, Guizhou Medical University, Guiyang 550014, China.

3. State Key Laboratory Breeding Base of Green Pesticide and Agricultural Bioengineering, Key Laboratory of Green Pesticide and Agricultural Bioengineering, Ministry of Education, Guizhou University, Guiyang 550025, China

***Corresponding author**

Dr. Shuzhong He, E-mail: [szhe@gzu.edu.cn](mailto:szhe@gzu.edu.cn)

Dr. Hang Zhong, E-mail: kzhong@guz.edu.cn

Dr. Yang Chen, E-mail: [ychen1@gzu.edu.cn](mailto:ychen1@gzu.edu.cn)

**SUPPLEMENTARY INFORMATION**

**Supplementary Methods**

The detailed characterization data of intermediates and target compounds

**Supplementary Results**

Figures. S1. The 1H NMR and 13C NMR spectra of intermediates and target compounds

Table S1. X-ray crystallographic data of compound **3h** (CCDC 2215220).

**Supplementary Methods**

The detailed characterization data of intermediates and target compounds

**6** (1.2 g, 71% yield); 1H NMR (400 MHz, CDCl3) *δ* 4.57 – 4.39 (m, 1H), 4.11 (dd, *J* = 10.8, 1.2 Hz, 1H), 2.20 – 2.04 (m, 2H), 1.97 – 1.66 (m, 3H), 1.18 (s, 3H), 1.10 (s, 3H), 0.98 (s, 3H).

**Aux-6** (1.0 g, 83% yield); 1H NMR (400 MHz, CDCl3) *δ* 4.97 – 4.85 (m, 1H), 4.07 (dt, *J* = 10.9, 1.3 Hz, 1H), 3.52 (dd, *J* = 10.9, 2.5 Hz, 1H), 3.12 – 2.97 (m, 1H), 2.03 – 1.77 (m, 2H), 1.70 – 1.48 (m, 3H), 1.08 (s, 3H), 0.91 (s, 3H), 0.87 (s, 3H).

**7** (1.0 g, 81% yield); 1H NMR (400 MHz, CDCl3) *δ* 4.74 (d, *J* = 0.9 Hz, 1H), 4.33 (dd, *J* = 12.2, 2.4 Hz, 2H), 4.04 (d, *J* = 10.9 Hz, 1H), 3.53 (dd, *J* = 10.9, 2.5 Hz, 1H), 2.40 (d, *J* = 2.4 Hz, 1H), 2.07 (ddd, *J* = 13.2, 9.9, 4.6 Hz, 1H), 1.94 – 1.73 (m, 1H), 1.69 – 1.45 (m, 2H), 1.41 – 1.20 (m, 1H), 1.09 (s, 3H), 0.90 (s, 3H), 0.86 (s, 3H).

**1f** (0.9 g, 90% yield); 1H NMR (400 MHz, CDCl3) *δ* 6.70 (t, *J* = 6.0 Hz, 1H), 5.42 (dd, *J* = 12.9, 6.1 Hz, 2H), 4.82 (s, 1H), 4.06 (d, *J* = 10.9 Hz, 1H), 3.59 (dd, *J* = 10.9, 2.4 Hz, 1H), 2.17 (s, 1H), 1.96 – 1.78 (m, 1H), 1.69 – 1.52 (m, 3H), 1.19 – 0.76 (m, 9H).

**3a**: 26 mg (64%); yellow oil; 1H NMR (400 MHz, CDCl3) *δ* 6.31 (ddd, *J* = 26.9, 6.1, 1.7 Hz, 2H), 5.08 (dd, *J* = 5.2, 1.8 Hz, 1H), 5.00 (d, *J* = 5.0 Hz, 1H), 4.81 (s, 1H), 4.39 (d, *J* = 5.2 Hz, 1H), 3.99 (d, *J* = 10.9 Hz, 1H), 3.50 (dd, *J* = 10.9, 2.5 Hz, 1H), 2.75 (dd, *J* = 15.5, 4.9 Hz, 1H), 2.34 (d, *J* = 15.5 Hz, 1H), 2.06 (td, *J* = 9.8, 5.0 Hz, 1H), 1.91 – 1.76 (m,1H), 1.67 – 1.45 (m, 3H), 1.06 (s, 3H), 0.94 (s, 3H), 0.89 (s, 3H); 13C NMR (100 MHz, CDCl3) *δ* 204.5, 134.2, 132.4, 103.2, 82.5, 80.7, 78.2, 68.4, 47.4, 45.8, 45.4, 42.5, 28.5, 26.0, 24.7, 17.7, 13.6; IR (KBr) cm-1 2962m, 2924m, 2869m, 1725m, 1463w, 1361w, 1322w, 1258w, 1175w, 1095s, 1012s, 964s, 804m, 723s; HRMS (ESI+): C17H24O4 for [M+Na]+, calculated 315.1572, found 315.1566; = + 9.921 (c 1.00, CHCl3).

**3b**: 15 mg (52% yield); yellow oil; 1H NMR (400 MHz, CDCl3) *δ* 6.26 (dd, *J* = 5.9, 1.8 Hz, 1H), 6.07 (d, *J* = 5.9 Hz, 1H), 5.10 – 5.00 (m, 1H), 4.81 (s, 1H), 4.35 (d, *J* = 5.2 Hz, 1H), 3.98 (d, *J* = 10.9 Hz, 1H), 3.49 (dd, *J* = 10.9, 2.5 Hz, 1H), 2.55 (s, 1H), 2.39 (d, *J* = 15.3 Hz, 1H), 2.10 – 1.99 (m, 1H), 1.91 – 1.77 (m, 1H), 1.63 – 1.52 (m, 3H), 1.49 (s, 3H), 1.05 (s, 3H), 0.93 (s, 3H), 0.88 (s, 3H); 13C NMR (100 MHz, CDCl3) *δ* 204.97, 137.38, 132.21, 103.07, 84.80, 81.21, 80.96, 68.40, 51.73, 47.42, 45.44, 42.54, 28.46, 25.95, 24.75, 22.77, 17.68, 13.62; IR (KBr) cm-1 2962m, 2927m, 2866m,1725m, 1460w, 1383w, 1325w, 1178w, 1115s, 1076s, 1006s, 830w, 736m, 727m; HRMS (ESI+): C18H26O4 for [M+Na]+, calculated 329.3918, found 329.17248; = + 17.105, (c 0.67, CHCl3)

**3c:** 21 mg (48% yield); yellow oil; 1H NMR (400 MHz, CDCl3) *δ* 6.27 (d, J = 6.0 Hz, 1H), 6.07 (d, *J* = 5.8 Hz, 1H), 5.07 (d, *J* = 5.2 Hz, 1H), 4.82 (s, 1H), 4.37 (d, *J* = 5.2 Hz, 1H), 3.98 (d, *J* = 11.0 Hz, 1H), 3.49 (d, *J* = 11.0 Hz, 1H), 2.55 (d, *J* = 15.2 Hz, 1H), 2.36 (d, *J* = 15.3 Hz, 1H), 2.07 (ddt, *J* = 14.8, 9.4, 5.3 Hz, 2H), 1.87 – 1.76 (m, 2H), 1.65 – 1.46 (m, 3H), 1.06 (s, 3H), 0.98 (t, *J* = 7.5 Hz, 3H), 0.94 (s, 3H), 0.89 (s, 3H); 13C NMR (100 MHz, CDCl3) *δ* 205.2, 136.0, 132.5, 103.1, 88.1, 81.6, 80.9, 68.4, 50.0, 47.4, 45.4, 42.5, 28.9, 28.5, 26.0, 24.8, 17.7, 13.6, 8.8; IR (KBr) cm-1 2959m, 2924m, 2850m, 1726m, 1470m, 1169w, 1120s, 1069s, 1008s, 967w, 826w, 804w, 733s; HRMS (ESI+): C19H28O4 for [M+Na]+, calculated 343.4188, found 343.18769; = + 16.221, (c 1.00, CHCl3).

**3d:**22 mg (47% yield); yellow oil; 1H NMR (400 MHz, CDCl3) *δ* 6.26 (dd, *J* = 5.9, 1.8 Hz, 1H), 6.08 (d, *J* = 6.0 Hz, 1H), 5.06 (dd, *J* = 5.2, 1.9 Hz, 1H), 4.82 (s, 1H), 4.37 (d, *J* = 5.2 Hz, 1H), 3.99 (d, *J* = 10.9 Hz, 1H), 3.50 (dd, *J* = 10.9, 2.5 Hz, 1H), 2.54 (s, 1H), 2.38 (s, 1H), 2.11 – 2.03 (m, 2H), 1.87 – 1.80 (m, 1H), 1.77 – 1.70 (m, 2H), 1.62 – 1.55 (m, 2H), 1.51 (m, 2H), 1.06 (s, 3H), 0.97 (s, 3H), 0.94 (m, 3H), 0.90 (d, *J* = 2.4 Hz, 3H); 13C NMR (100 MHz, CDCl3) *δ* 205.3, 136.3, 132.2, 103.1, 87.7, 81.6, 80.8, 68.4, 50.3, 47.4, 45.4, 42.5, 38.3, 28.5, 26.0, 24.8, 17.7, 17.4, 14.4, 13.6; IR (KBr) cm-1 2961w, 2930s, 2852w, 1730m, 1604w, 1513w, 1467m, 1393m, 1263m, 1183w, 1085s, 1008s, 962m, 825m, 795m, 764m, 706m, 661m, 559m; HRMS (ESI+): C20H30O4 for [M+Na]+, calculated 357.4458, found 357.20370; = + 140.898, (c 0.20, CHCl3).

**3e:** 22 mg (43% yield); yellow oil; 1H NMR (400 MHz, CDCl3) *δ* 6.27 (dd, *J* = 6.0, 1.8 Hz, 1H), 6.08 (d, *J* = 6.0 Hz, 1H), 5.12 – 5.03 (m, 1H), 4.82 (s, 1H), 4.37 (d, *J* = 5.2 Hz, 1H), 3.99 (dd, *J* = 11.0, 1.3 Hz, 1H), 3.50 (dd, *J* = 10.9, 2.5 Hz, 1H), 2.56 (d, *J* = 15.2 Hz, 1H), 2.44 – 2.34 (m, 1H), 2.08 (ddd, *J* = 12.9, 9.8, 4.7 Hz, 2H), 1.90 – 1.78 (m, 1H), 1.74 – 1.48 (m, 3H), 1.06 (s, 3H), 0.95 (s, 4H), 0.93 – 0.85 (m, 8H); 13C NMR (100 MHz, CDCl3) *δ* 205.2, 136.4, 132.3, 103.1, 87.7, 81.6, 80.8, 68.4, 50.4, 47.4, 45.5, 42.5, 36.1, 32.1, 28.5, 26.0, 24.8, 23.7, 22.6, 17.7, 14.1, 13.6; IR (KBr) cm-1 2957m, 2924m, 2877m, 1731m, 1492m, 1457m, 1396w, 1362w, 1309w,1274m, 1206w, 1184m, 1122m, 1082s, 972s, 893w, 817w, 738w, 708w, 601w; HRMS (ESI+): C22H34O4 for [M+Na]+, calculated 385.4998 found 385.47654; = + 121.312, (c 0.10, CHCl3).

**3f:** 17 mg (35% yield); yellow oil; 1H NMR (400 MHz, CDCl3) *δ* 6.34 (dd, *J* = 6.0, 1.8 Hz, 1H), 6.14 (d, *J* = 6.0 Hz, 1H), 5.12 (d, *J* = 5.3 Hz, 1H), 4.82 (s, 1H), 4.39 (d, *J* = 5.2 Hz, 1H), 3.99 (d, *J* = 10.9 Hz, 1H), 3.66 (s, 2H), 3.61 (dd, *J* = 7.0, 4.4 Hz, 1H), 3.51 (d, *J* = 2.5 Hz, 1H), 2.77 (d, *J* = 15.5 Hz, 1H), 2.38 (d, *J* = 15.4 Hz, 1H), 2.07 (ddd, *J* = 13.9, 9.7, 4.7 Hz, 1H), 1.84 (d, *J* = 6.0 Hz, 1H), 1.65 – 1.49 (m, 3H), 1.06 (s, 3H), 0.94 (s, 3H), 0.92 – 0.85 (m, 9H); 13C NMR (100 MHz, CDCl3) *δ* 204.9, 134.7, 133.1, 103.2, 87.3, 81.4, 81.2, 72.3, 68.4, 67.4, 47.4, 47.3, 45.4, 42.5, 28.5, 25.9, 24.8, 17.7, 15.0, 13.6; IR (KBr) cm-1 2963m, 2959m, 2857m, 1724m, 1467m, 1387w, 1263m, 1078s, 1011m, 965w,829m, 801m, 794m; HRMS (ESI+): C20H30O5 for [M+Na]+, calculated 373.4448, found 373.19847; = + 3.831, (c 0.10, CHCl3).

**3g:** 23 mg (45% yield); yellow oil; 1H NMR (400 MHz, CDCl3) *δ* 6.38 (d, *J* = 1.8 Hz, 1H), 6.20 (d, *J* = 6.0 Hz, 2H), 5.16 (dd, *J* = 5.2, 1.8 Hz, 2H), 5.05 (s, 2H), 4.82 (s, 2H), 4.39 (d, *J* = 5.2 Hz, 2H), 4.10 – 3.94 (m, 6H), 3.49 (dd, *J* = 11.0, 2.5 Hz, 2H), 2.76 (d, *J* = 15.5 Hz, 2H), 2.42 (d, *J* = 15.5 Hz, 2H), 2.12 – 2.00 (m, 3H), 1.83 (dt, *J* = 11.8, 5.8 Hz, 2H), 1.63 – 1.50 (m, 5H), 1.06 (s, 6H), 0.94 (s, 7H), 0.90 (d, *J* = 2.5 Hz, 11H); 13C NMR (100 MHz, CDCl3) *δ* 204.4, 133.7, 133.4, 103.2, 103.1, 88.2, 81.5, 81.3, 68.4, 65.9, 65.63, 5.40, 45.4, 44.8, 42.5, 28.5, 25.9, 24.7, 17.69, 13.6; IR (KBr) cm-1 2953m, 2918m, 2871m, 2853m, 1726m, 1467w, 1373w, 1315w, 1257w, 1176w, 1109s, 1078s, 1014m, 964m, 938m, 838w, 798w, 740m, 613w, 491w; HRMS (ESI+): C20H28O6 for [M+Na]+, calculated 387.4278, found 387.17796; = + 73.604, (c 0.12, CHCl3).

**3h:**21 mg (40% yield); white solid; mp 80.7~81.2°C; 1H NMR (400 MHz, CDCl3) *δ* 6.38 (d, J = 2.0 Hz, 1H), 4.97 (d, J = 5.1 Hz, 1H), 4.95 – 4.93 (m, 1H), 4.84 (s, 1H), 4.52 (d, *J* = 5.1 Hz, 1H), 4.00 (d, *J* = 10.9 Hz, 1H), 3.52 (dd, *J* = 10.9, 2.5 Hz, 1H), 2.77 (d, *J* = 4.8 Hz, 1H), 2.43 (d, *J* = 15.7 Hz, 1H), 2.24 (ddd, *J* = 13.8, 9.9, 4.6 Hz, 1H), 1.97 – 1.78 (m, 1H), 1.69 – 1.42 (m, 3H), 1.06 (s, 3H), 0.97 (s, 3H), 0.90 (s, 3H); 13C NMR (100 MHz, CDCl3) *δ* 203.4, 133.2, 123.1, 103.2, 83.5, 81.9, 79.4, 68.6, 47.5, 45.8, 45.4, 42.4, 28.2, 25.9, 24.7, 17.7, 13.6; IR (KBr) cm-1 2953m, 2927m, 2869m, 2847m, 1736m, 1463w, 1178w, 1111s, 1076s, 1008m, 967s, 829m, 736m, 701m; HRMS (ESI+): C17H23BrO4 for [M+Na]+, calculated 394.2608, found 393.06668; = + 2.450, (c 1.00, CHCl3).

**4** (11 mg, 88% yield) as a white solid. 1H NMR (400 MHz, CDCl3) δ 6.32 (t, *J* = 1.5 Hz, 2H), 5.10 (td, *J* = 3.6, 1.7 Hz, 2H), 4.39 (s, 1H), 2.91 (dd, *J* = 15.0, 4.9 Hz, 1H), 2.55 – 2.45 (m, 1H); = + 103.195, (c 0.10, CHCl3).

**Supplementary Results**

Figures. S1. The 1H NMR and 13C NMR spectra of intermediates and target compounds

Table S1. X-ray crystallographic data of compound **3h** (CCDC 2215220).


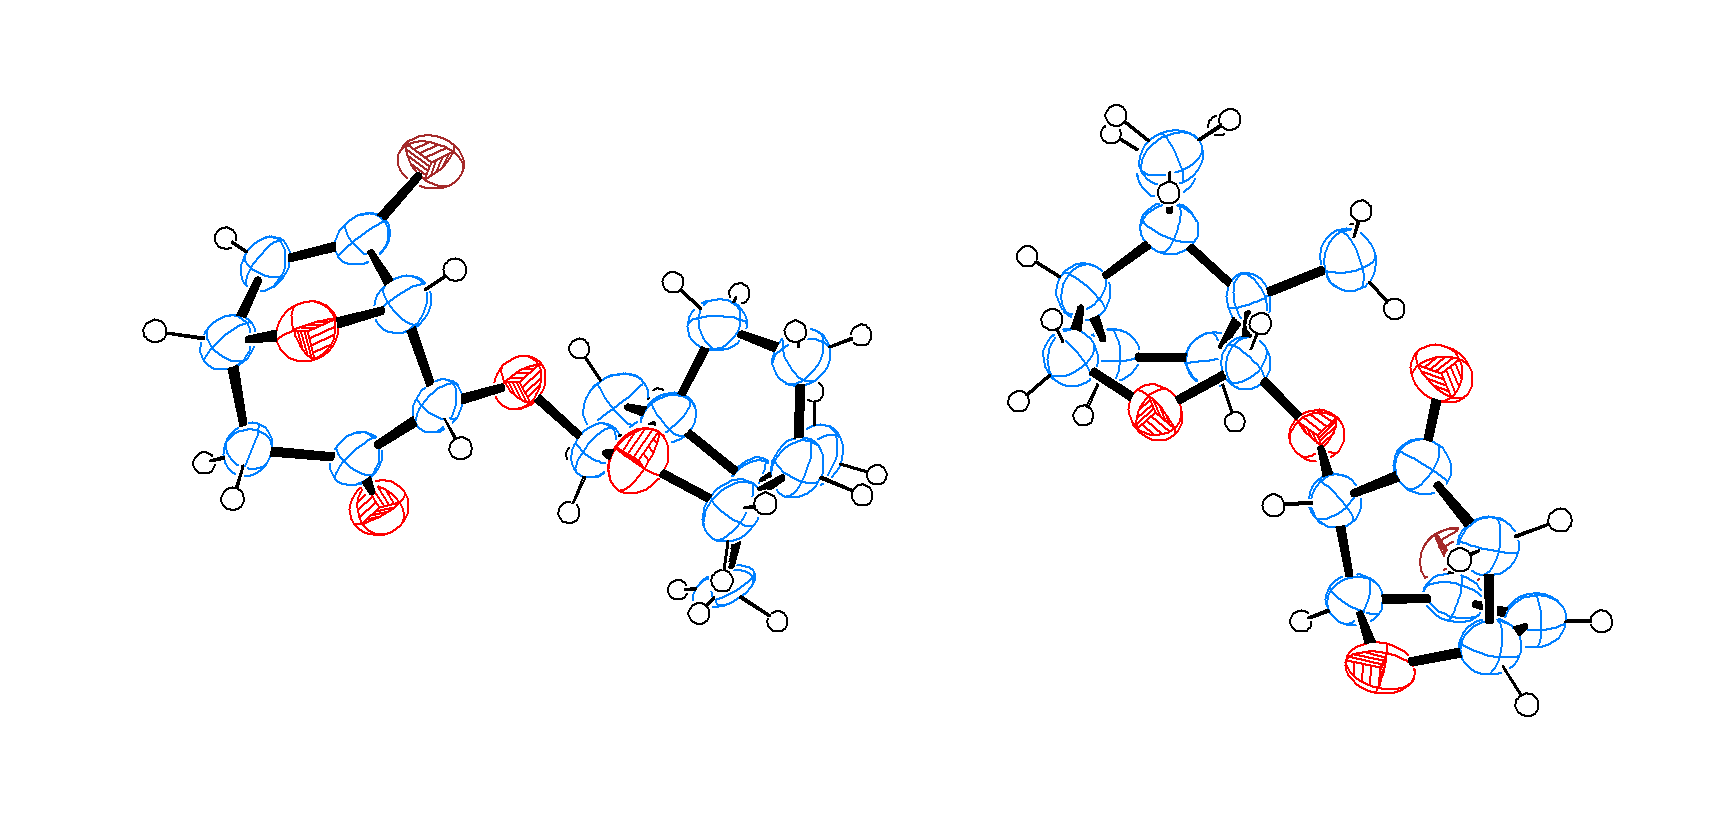


| Identification code | 221013a |
| --- | --- |
| Empirical formula | C17H23BrO4 |
| Formula weight | 371.26 |
| Temperature/K | 298(2) K |
| Crystal system | Monoclinic |
| Space group | P2 (1) |
| Unit cell dimensions | a = 11.1920 (12) Å |
|  | b = 7.1811 (8) Å |
| c = 21.758 (2) Å |
| α/°, β/°, γ/° | 90°, 104.705(4) °, 90° |
| Volume | 1691.4(3) Å3 |
| Z | 4 |
| Density (calculated) | 1.458 mg / m-3 |
| μ / mm‑1 | 2.445 |
| F (000) | 768 |
| Crystal size | 0.27 × 0.07 × 0.04 mm3 |
| 2Θ range for data collection | 1.94° to 28.44° |
| Index ranges | -14 ≤ h ≤ 14, -9 ≤ k ≤ 9, -28 ≤ l ≤ 29 |
| Reflections collected | 7217 |
| Independent reflections | 7230[ R (int) = 0.0000] |
| Data / restraints / parameters | 7230 / 1379 / 406 |
| Goodness-of-fit on F2 | 1.084 |
| Final R indexes [I>2σ (I) i.e.F0>4σ (F0)] | R1 = 0.1030, wR2 = 0.2845 |
| Final R indexes [all data] | R1 = 0.2062, wR2 = 0.3382 |
| Absolute structure parameter | 0.01(3) |
| Extinction coefficient | 0.010(3) |
| Largest diff. peak/hole/ e Å-3 | 0.676/-0.697 |
